# Supplementary material
Source: Royal Society of Chemistry journal article supplement (doi:10.1039/d5fo05589j)
Supplement: d5fo05589j1.pdf [file d5fo05589j1.pdf]

## Supplementary materials

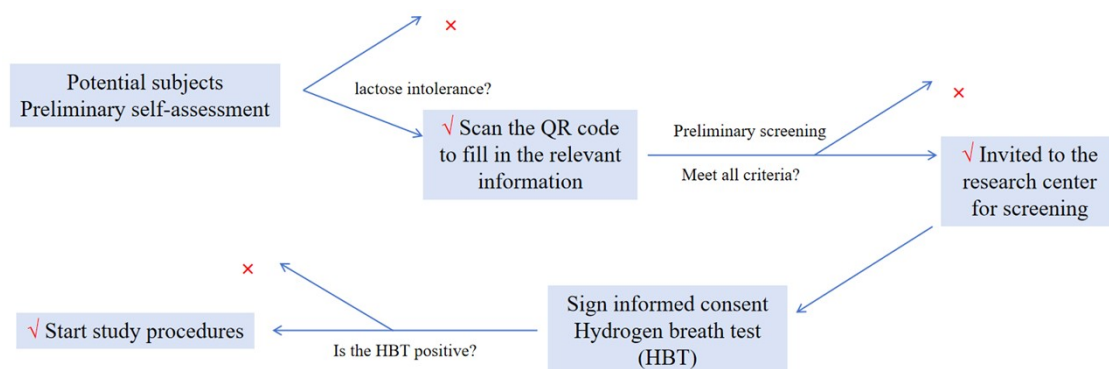

**Supplementary Fig. 1. Flowchart of participant screening and enrollment**

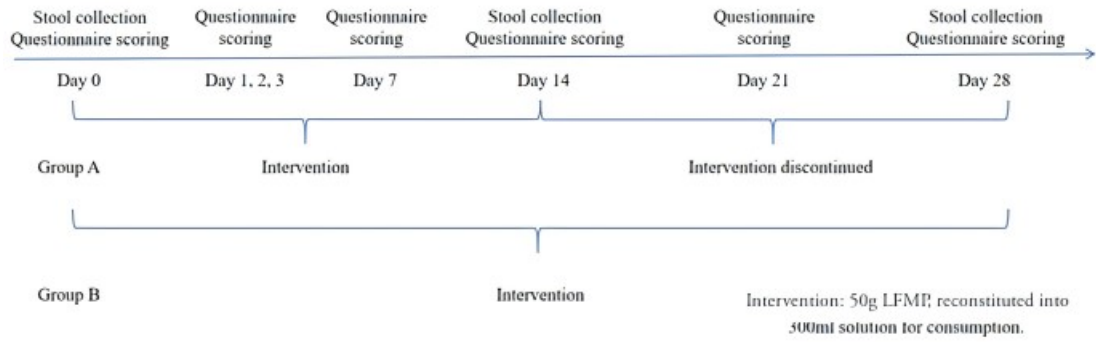

**Supplementary Fig. 2. Flowchart of the intervention trial**

**Supplementary Table 1. List of ingredients for two types of milk powder**

| Zero-lactose whole milk powder                                                                     | egular full-fat milk powder |
|----------------------------------------------------------------------------------------------------|-----------------------------|
| 0% lactose                                                                                         | containing lactose          |
| Raw milk                                                                                           |                             |
| <i>Bifidobacterium animalis subsp. lactis</i> HN019,                                               |                             |
| Bb-12, and BL-99 (each bacterial strain is added at a concentration of $\geq 2 \times 10^6$ CFU/g) |                             |
| GOS, 13.4 g/100 g ; (GOS degree of polymerization: n=2, 44.2%; n=3, 42.8%; n=4,                    | Raw milk                    |
| 8.6%; n=4, 5, 6, below the limit of                                                                |                             |
| quantification)                                                                                    |                             |
| Phospholipids                                                                                      |                             |

**Supplementary Table 2. Preparation of simulated digestion electrolyte solution  
(1.25 x)**

| Inorganic salt solutions                        | Potency/ (g/L) | SSF/mL | SGF/mL | SIF/mL |
|-------------------------------------------------|----------------|--------|--------|--------|
| KCl                                             | 37.3           | 37.75  | 17.25  | 17     |
| KH <sub>2</sub> PO <sub>4</sub>                 | 68             | 9.25   | 2.25   | 2      |
| NaHCO <sub>3</sub>                              | 84             | 17     | 31.25  | 106.25 |
| NaCl                                            | 117            | /      | 29.5   | 24     |
| MgCl <sub>2</sub> ·6H <sub>2</sub> O            | 30.5           | 1.25   | /      | 2.75   |
| (NH <sub>4</sub> ) <sub>2</sub> CO <sub>3</sub> | 48             | 0.15   | 1.25   | /      |
| CaCl <sub>2</sub> ·2H <sub>2</sub> O            | 44.1           | 50     | 10     | 80     |

Note: CaCl<sub>2</sub>·2H<sub>2</sub>O is added when used.

1 **Supplementary Table 3. Baseline characteristics of participants**

| Parameter                | Group A (n=22)                 | Group B (n=19)                   |
|--------------------------|--------------------------------|----------------------------------|
| Height (cm)              | 177.86±6.27 (M), 161±5.19 (F)  | 171.28±4.68 (M), 163.55±6.89 (F) |
| Weight (kg)              | 70.18±9.62 (M), 57.11±6.93 (F) | 68.25±9.82 (M), 54.36±5.87 (F)   |
| BMI (kg/m <sup>2</sup> ) | 22.05±1.87 (M), 22.07±2.34 (F) | 23.2±3.46 (M), 20.26±1.23 (F)    |

2 Note: (M: male; F: female).

**Supplementary Table 4. Gastrointestinal symptom scores pairwise comparisons**

| Day | (I) group | (J) group | Mean                 |            | Sig. <sup>a</sup> | 95% Confidence Interval for |             |
|-----|-----------|-----------|----------------------|------------|-------------------|-----------------------------|-------------|
|     |           |           | Difference (I-<br>J) | Std. Error |                   | Difference <sup>a</sup>     |             |
|     |           |           |                      |            |                   | Lower Bound                 | Upper Bound |
| 0   | A         | B         | -0.455               | 1.980      | 0.820             | -4.460                      | 3.551       |
|     | B         | A         | 0.455                | 1.980      | 0.820             | -3.551                      | 4.460       |
| 1   | A         | B         | 0.868                | 2.156      | 0.689             | -3.492                      | 5.229       |
|     | B         | A         | -0.868               | 2.156      | 0.689             | -5.229                      | 3.492       |
| 2   | A         | B         | 2.079                | 1.912      | 0.284             | -1.789                      | 5.947       |
|     | B         | A         | -2.079               | 1.912      | 0.284             | -5.947                      | 1.789       |
| 3   | A         | B         | 2.261                | 1.835      | 0.225             | -1.452                      | 5.973       |
|     | B         | A         | -2.261               | 1.835      | 0.225             | -5.973                      | 1.452       |
| 7   | A         | B         | 2.840                | 2.328      | 0.230             | -1.870                      | 7.549       |
|     | B         | A         | -2.840               | 2.328      | 0.230             | -7.549                      | 1.870       |
| 14  | A         | B         | 3.553                | 2.331      | 0.136             | -1.162                      | 8.268       |
|     | B         | A         | -3.553               | 2.331      | 0.136             | -8.268                      | 1.162       |
| 21  | A         | B         | 1.117                | 2.100      | 0.598             | -3.131                      | 5.366       |
|     | B         | A         | -1.117               | 2.100      | 0.598             | -5.366                      | 3.131       |
| 28  | A         | B         | -0.012               | 1.906      | 0.995             | -3.867                      | 3.843       |
|     | B         | A         | 0.012                | 1.906      | 0.995             | -3.843                      | 3.867       |

Based on estimated marginal means

a. Adjustment for multiple comparisons: Bonferroni.

| group | (I) day | (J) day | Mean                 |            | Sig. <sup>b</sup> | 95% Confidence Interval for |             |
|-------|---------|---------|----------------------|------------|-------------------|-----------------------------|-------------|
|       |         |         | Difference (I-<br>J) | Std. Error |                   | Difference <sup>b</sup>     |             |
|       |         |         |                      |            |                   | Lower Bound                 | Upper Bound |
| A     | 0       | 1       | -1.955               | 1.161      | 1.000             | -5.849                      | 1.940       |
|       |         | 2       | 0.045                | 1.074      | 1.000             | -3.556                      | 3.647       |
|       |         | 3       | 0.864                | 0.913      | 1.000             | -2.198                      | 3.925       |

---

|   |    |        |       |       |        |       |
|---|----|--------|-------|-------|--------|-------|
|   | 7  | -1.136 | 1.235 | 1.000 | -5.279 | 3.006 |
|   | 14 | -0.955 | 1.265 | 1.000 | -5.198 | 3.289 |
|   | 21 | 0.955  | 1.134 | 1.000 | -2.849 | 4.758 |
|   | 28 | 2.136  | 1.141 | 1.000 | -1.690 | 5.963 |
|   | 0  | 1.955  | 1.161 | 1.000 | -1.940 | 5.849 |
|   | 2  | 2.000  | 1.280 | 1.000 | -2.291 | 6.291 |
|   | 3  | 2.818  | 1.112 | 0.430 | -0.910 | 6.546 |
| 1 | 7  | 0.818  | 1.351 | 1.000 | -3.713 | 5.349 |
|   | 14 | 1.000  | 1.518 | 1.000 | -4.089 | 6.089 |
|   | 21 | 2.909  | 1.576 | 1.000 | -2.375 | 8.193 |
|   | 28 | 4.091  | 1.458 | 0.218 | -0.797 | 8.979 |
|   | 0  | -0.045 | 1.074 | 1.000 | -3.647 | 3.556 |
|   | 1  | -2.000 | 1.280 | 1.000 | -6.291 | 2.291 |
|   | 3  | 0.818  | 0.752 | 1.000 | -1.704 | 3.340 |
| 2 | 7  | -1.182 | 1.334 | 1.000 | -5.657 | 3.293 |
|   | 14 | -1.000 | 1.353 | 1.000 | -5.537 | 3.537 |
|   | 21 | 0.909  | 1.165 | 1.000 | -2.998 | 4.816 |
|   | 28 | 2.091  | 1.077 | 1.000 | -1.522 | 5.704 |
|   | 0  | -0.864 | 0.913 | 1.000 | -3.925 | 2.198 |
|   | 1  | -2.818 | 1.112 | 0.430 | -6.546 | .910  |
|   | 2  | -0.818 | 0.752 | 1.000 | -3.340 | 1.704 |
| 3 | 7  | -2.000 | 0.927 | 1.000 | -5.107 | 1.107 |
|   | 14 | -1.818 | 1.064 | 1.000 | -5.387 | 1.751 |
|   | 21 | 0.091  | 1.012 | 1.000 | -3.303 | 3.485 |
|   | 28 | 1.273  | 0.987 | 1.000 | -2.038 | 4.584 |
|   | 0  | 1.136  | 1.235 | 1.000 | -3.006 | 5.279 |
|   | 1  | -0.818 | 1.351 | 1.000 | -5.349 | 3.713 |
| 7 | 2  | 1.182  | 1.334 | 1.000 | -3.293 | 5.657 |
|   | 3  | 2.000  | 0.927 | 1.000 | -1.107 | 5.107 |

---

---

|   |    |    |        |       |       |        |       |
|---|----|----|--------|-------|-------|--------|-------|
|   |    | 14 | 0.182  | 1.036 | 1.000 | -3.293 | 3.656 |
|   |    | 21 | 2.091  | 1.162 | 1.000 | -1.805 | 5.987 |
|   |    | 28 | 3.273  | 1.109 | .149  | -0.446 | 6.991 |
|   |    | 0  | 0.955  | 1.265 | 1.000 | -3.289 | 5.198 |
|   |    | 1  | -1.000 | 1.518 | 1.000 | -6.089 | 4.089 |
|   |    | 2  | 1.000  | 1.353 | 1.000 | -3.537 | 5.537 |
|   | 14 | 3  | 1.818  | 1.064 | 1.000 | -1.751 | 5.387 |
|   |    | 7  | -0.182 | 1.036 | 1.000 | -3.656 | 3.293 |
|   |    | 21 | 1.909  | 1.125 | 1.000 | -1.865 | 5.683 |
|   |    | 28 | 3.091  | 1.272 | .555  | -1.175 | 7.357 |
|   |    | 0  | -0.955 | 1.134 | 1.000 | -4.758 | 2.849 |
|   |    | 1  | -2.909 | 1.576 | 1.000 | -8.193 | 2.375 |
|   |    | 2  | -0.909 | 1.165 | 1.000 | -4.816 | 2.998 |
|   | 21 | 3  | -0.091 | 1.012 | 1.000 | -3.485 | 3.303 |
|   |    | 7  | -2.091 | 1.162 | 1.000 | -5.987 | 1.805 |
|   |    | 14 | -1.909 | 1.125 | 1.000 | -5.683 | 1.865 |
|   |    | 28 | 1.182  | 0.780 | 1.000 | -1.434 | 3.798 |
|   |    | 0  | -2.136 | 1.141 | 1.000 | -5.963 | 1.690 |
|   |    | 1  | -4.091 | 1.458 | .218  | -8.979 | .797  |
|   |    | 2  | -2.091 | 1.077 | 1.000 | -5.704 | 1.522 |
|   | 28 | 3  | -1.273 | 0.987 | 1.000 | -4.584 | 2.038 |
|   |    | 7  | -3.273 | 1.109 | .149  | -6.991 | .446  |
|   |    | 14 | -3.091 | 1.272 | .555  | -7.357 | 1.175 |
|   |    | 21 | -1.182 | 0.780 | 1.000 | -3.798 | 1.434 |
|   |    | 1  | -0.632 | 1.250 | 1.000 | -4.823 | 3.559 |
|   | 0  | 2  | 2.579  | 1.156 | .881  | -1.296 | 6.454 |
| B |    | 3  | 3.579* | 0.982 | .022  | .284   | 6.874 |
|   |    | 7  | 2.158  | 1.329 | 1.000 | -2.299 | 6.615 |
|   |    | 14 | 3.053  | 1.362 | .861  | -1.514 | 7.619 |

---

---

|   |    |         |       |       |        |        |
|---|----|---------|-------|-------|--------|--------|
|   | 21 | 2.526   | 1.220 | 1.000 | -1.566 | 6.619  |
|   | 28 | 2.579   | 1.228 | 1.000 | -1.539 | 6.697  |
|   | 0  | 0.632   | 1.250 | 1.000 | -3.559 | 4.823  |
|   | 2  | 3.211   | 1.377 | .700  | -1.407 | 7.828  |
| 1 | 3  | 4.211*  | 1.196 | .031  | .199   | 8.222  |
|   | 7  | 2.789   | 1.454 | 1.000 | -2.086 | 7.665  |
|   | 14 | 3.684   | 1.633 | .833  | -1.792 | 9.160  |
|   | 21 | 3.158   | 1.696 | 1.000 | -2.528 | 8.844  |
|   | 28 | 3.211   | 1.568 | 1.000 | -2.049 | 8.470  |
|   | 0  | -2.579  | 1.156 | .881  | -6.454 | 1.296  |
|   | 1  | -3.211  | 1.377 | .700  | -7.828 | 1.407  |
| 2 | 3  | 1.000   | 0.809 | 1.000 | -1.714 | 3.714  |
|   | 7  | -0.421  | 1.436 | 1.000 | -5.236 | 4.394  |
|   | 14 | 0.474   | 1.456 | 1.000 | -4.409 | 5.356  |
|   | 21 | -0.053  | 1.254 | 1.000 | -4.257 | 4.152  |
|   | 28 | 0.000   | 1.159 | 1.000 | -3.887 | 3.887  |
|   | 0  | -3.579* | 0.982 | .022  | -6.874 | -0.284 |
|   | 1  | -4.211* | 1.196 | .031  | -8.222 | -0.199 |
| 3 | 2  | -1.000  | 0.809 | 1.000 | -3.714 | 1.714  |
|   | 7  | -1.421  | 0.997 | 1.000 | -4.765 | 1.922  |
|   | 14 | -0.526  | 1.145 | 1.000 | -4.367 | 3.314  |
|   | 21 | -1.053  | 1.089 | 1.000 | -4.704 | 2.599  |
|   | 28 | -1.000  | 1.062 | 1.000 | -4.563 | 2.563  |
|   | 0  | -2.158  | 1.329 | 1.000 | -6.615 | 2.299  |
|   | 1  | -2.789  | 1.454 | 1.000 | -7.665 | 2.086  |
| 7 | 2  | 0.421   | 1.436 | 1.000 | -4.394 | 5.236  |
|   | 3  | 1.421   | 0.997 | 1.000 | -1.922 | 4.765  |
|   | 14 | 0.895   | 1.115 | 1.000 | -2.844 | 4.633  |
|   | 21 | 0.368   | 1.250 | 1.000 | -3.824 | 4.561  |

---

---

|    |    |        |       |       |        |       |
|----|----|--------|-------|-------|--------|-------|
|    | 28 | 0.421  | 1.193 | 1.000 | -3.580 | 4.422 |
|    | 0  | -3.053 | 1.362 | .861  | -7.619 | 1.514 |
|    | 1  | -3.684 | 1.633 | .833  | -9.160 | 1.792 |
| 14 | 2  | -0.474 | 1.456 | 1.000 | -5.356 | 4.409 |
|    | 3  | 0.526  | 1.145 | 1.000 | -3.314 | 4.367 |
|    | 7  | -0.895 | 1.115 | 1.000 | -4.633 | 2.844 |
|    | 21 | -0.526 | 1.211 | 1.000 | -4.587 | 3.534 |
|    | 28 | -0.474 | 1.369 | 1.000 | -5.064 | 4.117 |
| 21 | 0  | -2.526 | 1.220 | 1.000 | -6.619 | 1.566 |
|    | 1  | -3.158 | 1.696 | 1.000 | -8.844 | 2.528 |
|    | 2  | 0.053  | 1.254 | 1.000 | -4.152 | 4.257 |
|    | 3  | 1.053  | 1.089 | 1.000 | -2.599 | 4.704 |
|    | 7  | -0.368 | 1.250 | 1.000 | -4.561 | 3.824 |
|    | 14 | 0.526  | 1.211 | 1.000 | -3.534 | 4.587 |
|    | 28 | 0.053  | 0.839 | 1.000 | -2.763 | 2.868 |
| 28 | 0  | -2.579 | 1.228 | 1.000 | -6.697 | 1.539 |
|    | 1  | -3.211 | 1.568 | 1.000 | -8.470 | 2.049 |
|    | 2  | 0.000  | 1.159 | 1.000 | -3.887 | 3.887 |
|    | 3  | 1.000  | 1.062 | 1.000 | -2.563 | 4.563 |
|    | 7  | -0.421 | 1.193 | 1.000 | -4.422 | 3.580 |
|    | 14 | 0.474  | 1.369 | 1.000 | -4.117 | 5.064 |
|    | 21 | -0.053 | 0.839 | 1.000 | -2.868 | 2.763 |

---

Based on estimated marginal means

\*. The mean difference is significant at the .05 level.

b. Adjustment for multiple comparisons: Bonferroni.

---

**Supplementary Table 5. Physical functioning score pairwise comparisons**

| Day | (I) group | (J) group | Mean                 |            | Sig. <sup>a</sup> | 95% Confidence Interval for |             |
|-----|-----------|-----------|----------------------|------------|-------------------|-----------------------------|-------------|
|     |           |           | Difference (I-<br>J) | Std. Error |                   | Difference <sup>a</sup>     |             |
|     |           |           |                      |            |                   | Lower Bound                 | Upper Bound |
| 0   | A         | B         | 0.431                | 1.698      | 0.801             | -3.005                      | 3.866       |
|     | B         | A         | -0.431               | 1.698      | 0.801             | -3.866                      | 3.005       |
| 1   | A         | B         | 0.323                | 1.547      | 0.836             | -2.806                      | 3.452       |
|     | B         | A         | -0.323               | 1.547      | 0.836             | -3.452                      | 2.806       |
| 2   | A         | B         | -0.694               | 1.363      | 0.614             | -3.451                      | 2.064       |
|     | B         | A         | 0.694                | 1.363      | 0.614             | -2.064                      | 3.451       |
| 3   | A         | B         | 0.514                | 1.405      | 0.716             | -2.328                      | 3.357       |
|     | B         | A         | -0.514               | 1.405      | 0.716             | -3.357                      | 2.328       |
| 7   | A         | B         | 0.706                | 1.184      | 0.554             | -1.689                      | 3.100       |
|     | B         | A         | -0.706               | 1.184      | 0.554             | -3.100                      | 1.689       |
| 14  | A         | B         | 0.969                | 1.135      | 0.399             | -1.327                      | 3.265       |
|     | B         | A         | -0.969               | 1.135      | 0.399             | -3.265                      | 1.327       |
| 21  | A         | B         | 5.813                | 4.964      | 0.249             | -4.226                      | 15.853      |
|     | B         | A         | -5.813               | 4.964      | 0.249             | -15.853                     | 4.226       |
| 28  | A         | B         | 1.495                | 1.244      | 0.237             | -1.020                      | 4.011       |
|     | B         | A         | -1.495               | 1.244      | 0.237             | -4.011                      | 1.020       |

  

| group | (I) day | (J) day | Mean                 |            | Sig. <sup>a</sup> | 95% Confidence Interval for |             |
|-------|---------|---------|----------------------|------------|-------------------|-----------------------------|-------------|
|       |         |         | Difference (I-<br>J) | Std. Error |                   | Difference <sup>a</sup>     |             |
|       |         |         |                      |            |                   | Lower Bound                 | Upper Bound |
|       |         | 1       | -0.682               | 0.515      | 1.000             | -2.410                      | 1.047       |
|       |         | 2       | -0.455               | 0.723      | 1.000             | -2.878                      | 1.969       |
|       | 0       | 3       | -1.136               | 0.662      | 1.000             | -3.355                      | 1.082       |
|       |         | 7       | -1.591               | 0.602      | 0.332             | -3.611                      | 0.429       |
|       |         | 14      | -1.591               | 0.590      | 0.287             | -3.568                      | 0.386       |

---

|   |    |        |       |       |         |        |
|---|----|--------|-------|-------|---------|--------|
|   | 21 | -0.909 | 3.393 | 1.000 | -12.287 | 10.468 |
|   | 28 | -1.591 | 0.605 | 0.341 | -3.620  | 0.438  |
|   | 0  | 0.682  | 0.515 | 1.000 | -1.047  | 2.410  |
|   | 2  | 0.227  | 0.526 | 1.000 | -1.535  | 1.990  |
| 1 | 3  | -0.455 | 0.656 | 1.000 | -2.654  | 1.745  |
|   | 7  | -0.909 | 0.454 | 1.000 | -2.430  | 0.612  |
|   | 14 | -0.909 | 0.546 | 1.000 | -2.739  | 0.921  |
|   | 21 | -0.227 | 3.371 | 1.000 | -11.530 | 11.076 |
|   | 28 | -0.909 | 0.546 | 1.000 | -2.739  | 0.421  |
|   | 0  | 0.455  | 0.723 | 1.000 | -1.969  | 2.878  |
|   | 1  | -0.227 | 0.526 | 1.000 | -1.990  | 1.535  |
| 2 | 3  | -0.682 | 0.494 | 1.000 | -2.339  | 0.475  |
|   | 7  | -1.136 | 0.445 | 0.414 | -2.630  | 0.358  |
|   | 14 | -1.136 | 0.430 | 1.000 | -2.915  | 0.642  |
|   | 21 | -0.455 | 3.358 | 1.000 | -11.715 | 10.806 |
|   | 28 | -1.136 | 0.567 | 1.000 | -3.037  | 0.764  |
|   | 0  | 1.136  | 0.662 | 1.000 | -1.082  | 3.355  |
|   | 1  | 0.455  | 0.656 | 1.000 | -1.745  | 2.654  |
| 3 | 2  | 0.682  | 0.494 | 1.000 | -0.975  | 2.339  |
|   | 7  | -0.455 | 0.505 | 1.000 | -2.149  | 1.240  |
|   | 14 | -0.455 | 0.334 | 1.000 | -1.573  | 0.664  |
|   | 21 | 0.227  | 3.348 | 1.000 | -11.001 | 11.455 |
|   | 28 | -0.455 | 0.582 | 1.000 | -2.405  | 1.496  |
|   | 0  | 1.591  | 0.602 | 0.332 | -0.429  | 3.611  |
|   | 1  | 0.909  | 0.454 | 1.000 | -0.612  | 2.430  |
| 7 | 2  | 1.136  | 0.445 | 0.414 | -0.358  | 2.630  |
|   | 3  | 0.455  | 0.505 | 1.000 | -1.240  | 2.149  |
|   | 14 | 0.000  | 0.293 | 1.000 | -0.983  | 0.983  |
|   | 21 | 0.682  | 3.350 | 1.000 | -10.552 | 11.915 |

---

---

|    |    |            |       |       |         |        |
|----|----|------------|-------|-------|---------|--------|
|    | 28 | 1.421E-14  | 0.363 | 1.000 | -1.218  | 1.218  |
|    | 0  | 1.591      | 0.590 | 0.287 | -0.386  | 3.568  |
|    | 1  | 0.909      | 0.546 | 1.000 | -0.921  | 2.739  |
|    | 2  | 1.136      | 0.530 | 1.000 | -0.642  | 2.915  |
| 14 | 3  | 0.455      | 0.334 | 1.000 | -0.664  | 1.573  |
|    | 7  | 0.000      | 0.293 | 1.000 | -0.983  | 0.983  |
|    | 21 | 0.682      | 3.338 | 1.000 | -10.512 | 11.875 |
|    | 28 | 1.421E-14  | 0.411 | 1.000 | -1.377  | 1.377  |
|    | 0  | 0.909      | 3.393 | 1.000 | -10.468 | 12.287 |
|    | 1  | 0.227      | 3.371 | 1.000 | -11.076 | 11.530 |
|    | 2  | 0.455      | 3.358 | 1.000 | -10.806 | 11.715 |
| 21 | 3  | -0.227     | 3.348 | 1.000 | -11.455 | 11.001 |
|    | 7  | -0.682     | 3.350 | 1.000 | -11.915 | 10.552 |
|    | 14 | -0.682     | 3.338 | 1.000 | -11.875 | 10.512 |
|    | 28 | -0.682     | 3.391 | 1.000 | -12.052 | 10.689 |
|    | 0  | 1.591      | 0.605 | .341  | -0.438  | 3.620  |
|    | 1  | 0.909      | 0.546 | 1.000 | -0.921  | 2.739  |
|    | 2  | 1.136      | 0.567 | 1.000 | -0.764  | 3.037  |
| 28 | 3  | 0.455      | 0.582 | 1.000 | -1.496  | 2.405  |
|    | 7  | -1.421E-14 | 0.363 | 1.000 | -1.218  | 1.218  |
|    | 14 | -1.421E-14 | 0.411 | 1.000 | -1.377  | 1.377  |
|    | 21 | 0.682      | 3.391 | 1.000 | -10.689 | 12.052 |
|    | 1  | -0.789     | 0.555 | 1.000 | -2.649  | 1.070  |
|    | 2  | -1.579     | 0.778 | 1.000 | -4.187  | 1.029  |
| 0  | 3  | -1.053     | 0.712 | 1.000 | -3.440  | 1.335  |
|    | 7  | -1.316     | 0.648 | 1.000 | -3.490  | 0.858  |
|    | 14 | -1.053     | 0.634 | 1.000 | -3.180  | 1.075  |
|    | 21 | 4.474      | 3.651 | 1.000 | -7.769  | 16.716 |
|    | 28 | -0.526     | 0.651 | 1.000 | -2.709  | 1.657  |

---

---

|   |    |            |       |       |        |        |
|---|----|------------|-------|-------|--------|--------|
|   | 0  | 0.789      | 0.555 | 1.000 | -1.070 | 2.649  |
|   | 2  | -0.789     | 0.566 | 1.000 | -2.686 | 1.107  |
| 1 | 3  | -0.263     | 0.706 | 1.000 | -2.630 | 2.104  |
|   | 7  | -0.526     | 0.488 | 1.000 | -2.163 | 1.111  |
|   | 14 | -0.263     | 0.587 | 1.000 | -2.232 | 1.706  |
|   | 21 | 5.263      | 3.627 | 1.000 | -6.899 | 17.426 |
|   | 28 | 0.263      | 0.587 | 1.000 | -1.706 | 2.232  |
|   | 0  | 1.579      | 0.778 | 1.000 | -1.029 | 4.187  |
|   | 1  | 0.789      | 0.566 | 1.000 | -1.107 | 2.686  |
| 2 | 3  | 0.526      | 0.532 | 1.000 | -1.257 | 2.309  |
|   | 7  | 0.263      | 0.479 | 1.000 | -1.344 | 1.871  |
|   | 14 | 0.526      | 0.571 | 1.000 | -1.387 | 2.440  |
|   | 21 | 6.053      | 3.613 | 1.000 | -6.064 | 18.169 |
|   | 28 | 1.053      | 0.610 | 1.000 | -0.992 | 3.098  |
|   | 0  | 1.053      | 0.712 | 1.000 | -1.335 | 3.440  |
|   | 1  | 0.263      | 0.706 | 1.000 | -2.104 | 2.630  |
| 3 | 2  | -0.526     | 0.532 | 1.000 | -2.309 | 1.257  |
|   | 7  | -0.263     | 0.544 | 1.000 | -2.087 | 1.560  |
|   | 14 | -1.421E-14 | 0.359 | 1.000 | -1.204 | 1.204  |
|   | 21 | 5.526      | 3.603 | 1.000 | -6.556 | 17.608 |
|   | 28 | 0.526      | 0.626 | 1.000 | -1.572 | 2.625  |
|   | 0  | 1.316      | 0.648 | 1.000 | -0.858 | 3.490  |
|   | 1  | 0.526      | 0.488 | 1.000 | -1.111 | 2.163  |
| 7 | 2  | -0.263     | 0.479 | 1.000 | -1.871 | 1.344  |
|   | 3  | 0.263      | 0.544 | 1.000 | -1.560 | 2.087  |
|   | 14 | 0.263      | 0.315 | 1.000 | -0.794 | 1.321  |
|   | 21 | 5.789      | 3.605 | 1.000 | -6.298 | 17.877 |
|   | 28 | 0.789      | 0.391 | 1.000 | -0.521 | 2.100  |
|   | 0  | 1.053      | 0.634 | 1.000 | -1.075 | 3.180  |

---

---

|    |    |           |       |       |         |        |
|----|----|-----------|-------|-------|---------|--------|
|    | 1  | 0.263     | 0.587 | 1.000 | -1.706  | 2.232  |
|    | 2  | -0.526    | 0.571 | 1.000 | -2.440  | 1.387  |
|    | 3  | 1.421E-14 | 0.359 | 1.000 | -1.204  | 1.204  |
|    | 7  | -0.263    | 0.315 | 1.000 | -1.321  | 0.794  |
|    | 21 | 5.526     | 3.592 | 1.000 | -6.518  | 17.571 |
|    | 28 | 0.526     | 0.442 | 1.000 | -0.956  | 2.008  |
|    | 0  | -4.474    | 3.651 | 1.000 | -16.716 | 7.769  |
|    | 1  | -5.263    | 3.627 | 1.000 | -17.426 | 6.899  |
| 21 | 2  | -6.053    | 3.613 | 1.000 | -18.169 | 6.064  |
|    | 3  | -5.526    | 3.603 | 1.000 | -17.608 | 6.556  |
|    | 7  | -5.789    | 3.605 | 1.000 | -17.877 | 6.298  |
|    | 14 | -5.526    | 3.592 | 1.000 | -17.571 | 6.518  |
|    | 28 | -5.000    | 3.649 | 1.000 | -17.235 | 7.235  |
|    | 0  | 0.526     | 0.651 | 1.000 | -1.657  | 2.709  |
|    | 1  | -0.263    | 0.587 | 1.000 | -2.232  | 1.706  |
| 28 | 2  | -1.053    | 0.610 | 1.000 | -3.098  | 0.992  |
|    | 3  | -0.526    | 0.626 | 1.000 | -2.625  | 1.572  |
|    | 7  | -0.789    | 0.391 | 1.000 | -2.100  | .521   |
|    | 14 | -0.526    | 0.442 | 1.000 | -2.008  | 0.956  |
|    | 21 | 5.000     | 3.649 | 1.000 | -7.235  | 17.235 |

---

Based on estimated marginal means

a. Adjustment for multiple comparisons: Bonferroni.

---

**Supplementary Table 6. Role-Physical score pairwise comparisons**

| Day | (I) group | (J) group | Mean                 |            | Sig. <sup>a</sup> | 95% Confidence Interval for |             |
|-----|-----------|-----------|----------------------|------------|-------------------|-----------------------------|-------------|
|     |           |           | Difference (I-<br>J) | Std. Error |                   | Difference <sup>a</sup>     |             |
|     |           |           |                      |            |                   | Lower Bound                 | Upper Bound |
| 0   | A         | B         | -7.416               | 6.865      | 0.287             | -21.302                     | 6.469       |
|     | B         | A         | 7.416                | 6.865      | 0.287             | -6.469                      | 21.302      |
| 1   | A         | B         | -2.691               | 6.626      | 0.687             | -16.094                     | 10.711      |
|     | B         | A         | 2.691                | 6.626      | 0.687             | -10.711                     | 16.094      |
| 2   | A         | B         | -4.785               | 8.235      | 0.565             | -21.441                     | 11.871      |
|     | B         | A         | 4.785                | 8.235      | 0.565             | -11.871                     | 21.441      |
| 3   | A         | B         | -4.964               | 6.690      | 0.463             | -18.497                     | 8.568       |
|     | B         | A         | 4.964                | 6.690      | 0.463             | -8.568                      | 18.497      |
| 7   | A         | B         | -4.007               | 6.052      | 0.512             | -16.248                     | 8.234       |
|     | B         | A         | 4.007                | 6.052      | 0.512             | -8.234                      | 16.248      |
| 14  | A         | B         | -2.333               | 7.872      | 0.769             | -18.255                     | 13.590      |
|     | B         | A         | 2.333                | 7.872      | 0.769             | -13.590                     | 18.255      |
| 21  | A         | B         | -7.775               | 6.871      | 0.265             | -21.674                     | 6.124       |
|     | B         | A         | 7.775                | 6.871      | 0.265             | -6.124                      | 21.674      |
| 28  | A         | B         | -1.914               | 5.474      | 0.728             | -12.986                     | 9.158       |
|     | B         | A         | 1.914                | 5.474      | 0.728             | -9.158                      | 12.986      |

  

| group | (I) day | (J) day | Mean                 |            | Sig. <sup>a</sup> | 95% Confidence Interval for |             |
|-------|---------|---------|----------------------|------------|-------------------|-----------------------------|-------------|
|       |         |         | Difference (I-<br>J) | Std. Error |                   | Difference <sup>a</sup>     |             |
|       |         |         |                      |            |                   | Lower Bound                 | Upper Bound |
| A     | 0       | 1       | -3.409               | 4.793      | 1.000             | -19.482                     | 12.664      |
|       |         | 2       | 1.421E-14            | 5.384      | 1.000             | -18.054                     | 18.054      |
|       |         | 3       | -1.136               | 4.508      | 1.000             | -16.255                     | 13.982      |
|       |         | 7       | -3.409               | 5.020      | 1.000             | -20.242                     | 13.424      |
|       |         | 14      | -1.136               | 5.628      | 1.000             | -20.009                     | 17.736      |

---

|   |    |            |       |       |         |        |
|---|----|------------|-------|-------|---------|--------|
|   | 21 | -2.273     | 5.371 | 1.000 | -20.285 | 15.740 |
|   | 28 | -6.818     | 5.213 | 1.000 | -24.301 | 10.664 |
|   | 0  | 3.409      | 4.793 | 1.000 | -12.664 | 19.482 |
|   | 2  | 3.409      | 2.636 | 1.000 | -5.430  | 12.248 |
| 1 | 3  | 2.273      | 2.386 | 1.000 | -5.730  | 10.275 |
|   | 7  | 0.000      | 2.824 | 1.000 | -9.470  | 9.470  |
|   | 14 | 2.273      | 4.798 | 1.000 | -13.818 | 18.364 |
|   | 21 | 1.136      | 4.308 | 1.000 | -13.311 | 15.584 |
|   | 28 | -3.409     | 3.659 | 1.000 | -15.680 | 8.861  |
|   | 0  | -1.421E-14 | 5.384 | 1.000 | -18.054 | 18.054 |
|   | 1  | -3.409     | 2.636 | 1.000 | -12.248 | 5.430  |
| 2 | 3  | -1.136     | 2.073 | 1.000 | -8.089  | 5.817  |
|   | 7  | -3.409     | 3.003 | 1.000 | -13.480 | 6.661  |
|   | 14 | -1.136     | 5.525 | 1.000 | -19.663 | 17.390 |
|   | 21 | -2.273     | 5.595 | 1.000 | -21.035 | 16.490 |
|   | 28 | -6.818     | 5.041 | 1.000 | -23.724 | 10.088 |
|   | 0  | 1.136      | 4.508 | 1.000 | -13.982 | 16.255 |
|   | 1  | -2.273     | 2.386 | 1.000 | -10.275 | 5.730  |
| 3 | 2  | 1.136      | 2.073 | 1.000 | -5.817  | 8.089  |
|   | 7  | -2.273     | 2.220 | 1.000 | -9.717  | 5.172  |
|   | 14 | 0.000      | 4.658 | 1.000 | -15.621 | 15.621 |
|   | 21 | -1.136     | 4.634 | 1.000 | -16.676 | 14.404 |
|   | 28 | -5.682     | 3.784 | 1.000 | -18.370 | 7.006  |
|   | 0  | 3.409      | 5.020 | 1.000 | -13.424 | 20.242 |
|   | 1  | 0.000      | 2.824 | 1.000 | -9.470  | 9.470  |
| 7 | 2  | 3.409      | 3.003 | 1.000 | -6.661  | 13.480 |
|   | 3  | 2.273      | 2.220 | 1.000 | -5.172  | 9.717  |
|   | 14 | 2.273      | 3.656 | 1.000 | -9.986  | 14.531 |
|   | 21 | 1.136      | 3.492 | 1.000 | -10.575 | 12.848 |

---

---

|   |    |    |        |       |       |         |        |
|---|----|----|--------|-------|-------|---------|--------|
|   |    | 28 | -3.409 | 3.140 | 1.000 | -13.940 | 7.122  |
|   |    | 0  | 1.136  | 5.628 | 1.000 | -17.736 | 20.009 |
|   |    | 1  | -2.273 | 4.798 | 1.000 | -18.364 | 13.818 |
|   | 14 | 2  | 1.136  | 5.525 | 1.000 | -17.390 | 19.663 |
|   |    | 3  | 0.000  | 4.658 | 1.000 | -15.621 | 15.621 |
|   |    | 7  | -2.273 | 3.656 | 1.000 | -14.531 | 9.986  |
|   |    | 21 | -1.136 | 2.509 | 1.000 | -9.549  | 7.276  |
|   |    | 28 | -5.682 | 4.095 | 1.000 | -19.414 | 8.051  |
|   |    | 0  | 2.273  | 5.371 | 1.000 | -15.740 | 20.285 |
|   |    | 1  | -1.136 | 4.308 | 1.000 | -15.584 | 13.311 |
|   | 21 | 2  | 2.273  | 5.595 | 1.000 | -16.490 | 21.035 |
|   |    | 3  | 1.136  | 4.634 | 1.000 | -14.404 | 16.676 |
|   |    | 7  | -1.136 | 3.492 | 1.000 | -12.848 | 10.575 |
|   |    | 14 | 1.136  | 2.509 | 1.000 | -7.276  | 9.549  |
|   |    | 28 | -4.545 | 3.838 | 1.000 | -17.415 | 8.324  |
|   |    | 0  | 6.818  | 5.213 | 1.000 | -10.664 | 24.301 |
|   |    | 1  | 3.409  | 3.659 | 1.000 | -8.861  | 15.680 |
|   | 28 | 2  | 6.818  | 5.041 | 1.000 | -10.088 | 23.724 |
|   |    | 3  | 5.682  | 3.784 | 1.000 | -7.006  | 18.370 |
|   |    | 7  | 3.409  | 3.140 | 1.000 | -7.122  | 13.940 |
|   |    | 14 | 5.682  | 4.095 | 1.000 | -8.051  | 19.414 |
|   |    | 21 | 4.545  | 3.838 | 1.000 | -8.324  | 17.415 |
|   |    | 1  | 1.316  | 5.158 | 1.000 | -15.980 | 18.611 |
|   | 0  | 2  | 2.632  | 5.793 | 1.000 | -16.795 | 22.058 |
| B |    | 3  | 1.316  | 4.851 | 1.000 | -14.952 | 17.584 |
|   |    | 7  | 0.000  | 5.401 | 1.000 | -18.113 | 18.113 |
|   |    | 14 | 3.947  | 6.056 | 1.000 | -16.361 | 24.255 |
|   |    | 21 | -2.632 | 5.780 | 1.000 | -22.014 | 16.751 |
|   |    | 28 | -1.316 | 5.610 | 1.000 | -20.128 | 17.496 |

---

---

|    |    |        |       |       |         |        |
|----|----|--------|-------|-------|---------|--------|
|    | 0  | -1.316 | 5.158 | 1.000 | -18.611 | 15.980 |
| 1  | 2  | 1.316  | 2.836 | 1.000 | -8.196  | 10.827 |
|    | 3  | 0.000  | 2.568 | 1.000 | -8.611  | 8.611  |
|    | 7  | -1.316 | 3.039 | 1.000 | -11.506 | 8.874  |
|    | 14 | 2.632  | 5.163 | 1.000 | -14.683 | 19.946 |
|    | 21 | -3.947 | 4.636 | 1.000 | -19.494 | 11.599 |
|    | 28 | -2.632 | 3.937 | 1.000 | -15.835 | 10.572 |
| 2  | 0  | -2.632 | 5.793 | 1.000 | -22.058 | 16.795 |
|    | 1  | -1.316 | 2.836 | 1.000 | -10.827 | 8.196  |
|    | 3  | -1.316 | 2.231 | 1.000 | -8.798  | 6.166  |
|    | 7  | -2.632 | 3.231 | 1.000 | -13.468 | 8.205  |
|    | 14 | 1.316  | 5.945 | 1.000 | -18.620 | 21.252 |
|    | 21 | -5.263 | 6.021 | 1.000 | -25.453 | 14.927 |
| 3  | 28 | -3.947 | 5.425 | 1.000 | -22.139 | 14.244 |
|    | 0  | -1.316 | 4.851 | 1.000 | -17.584 | 14.952 |
|    | 1  | 0.000  | 2.568 | 1.000 | -8.611  | 8.611  |
|    | 2  | 1.316  | 2.231 | 1.000 | -6.166  | 8.798  |
|    | 7  | -1.316 | 2.389 | 1.000 | -9.326  | 6.695  |
|    | 14 | 2.632  | 5.013 | 1.000 | -14.178 | 19.441 |
| 7  | 21 | -3.947 | 4.987 | 1.000 | -20.669 | 12.775 |
|    | 28 | -2.632 | 4.071 | 1.000 | -16.285 | 11.022 |
|    | 0  | 0.000  | 5.401 | 1.000 | -18.113 | 18.113 |
|    | 1  | 1.316  | 3.039 | 1.000 | -8.874  | 11.506 |
|    | 2  | 2.632  | 3.231 | 1.000 | -8.205  | 13.468 |
|    | 3  | 1.316  | 2.389 | 1.000 | -6.695  | 9.326  |
| 14 | 14 | 3.947  | 3.934 | 1.000 | -9.243  | 17.138 |
|    | 21 | -2.632 | 3.758 | 1.000 | -15.234 | 9.971  |
|    | 28 | -1.316 | 3.379 | 1.000 | -12.648 | 10.016 |
|    | 0  | -3.947 | 6.056 | 1.000 | -24.255 | 16.361 |

---

---

|    |    |        |       |       |         |        |
|----|----|--------|-------|-------|---------|--------|
|    | 1  | -2.632 | 5.163 | 1.000 | -19.946 | 14.683 |
|    | 2  | -1.316 | 5.945 | 1.000 | -21.252 | 18.620 |
|    | 3  | -2.632 | 5.013 | 1.000 | -19.441 | 14.178 |
|    | 7  | -3.947 | 3.934 | 1.000 | -17.138 | 9.243  |
|    | 21 | -6.579 | 2.699 | .545  | -15.631 | 2.473  |
|    | 28 | -5.263 | 4.407 | 1.000 | -20.040 | 9.514  |
|    | 0  | 2.632  | 5.780 | 1.000 | -16.751 | 22.014 |
| 21 | 1  | 3.947  | 4.636 | 1.000 | -11.599 | 19.494 |
|    | 2  | 5.263  | 6.021 | 1.000 | -14.927 | 25.453 |
|    | 3  | 3.947  | 4.987 | 1.000 | -12.775 | 20.669 |
|    | 7  | 2.632  | 3.758 | 1.000 | -9.971  | 15.234 |
|    | 14 | 6.579  | 2.699 | 0.545 | -2.473  | 15.631 |
|    | 28 | 1.316  | 4.130 | 1.000 | -12.533 | 15.164 |
|    | 0  | 1.316  | 5.610 | 1.000 | -17.496 | 20.128 |
| 28 | 1  | 2.632  | 3.937 | 1.000 | -10.572 | 15.835 |
|    | 2  | 3.947  | 5.425 | 1.000 | -14.244 | 22.139 |
|    | 3  | 2.632  | 4.071 | 1.000 | -11.022 | 16.285 |
|    | 7  | 1.316  | 3.379 | 1.000 | -10.016 | 12.648 |
|    | 14 | 5.263  | 4.407 | 1.000 | -9.514  | 20.040 |
|    | 21 | -1.316 | 4.130 | 1.000 | -15.164 | 12.533 |
|    |    |        |       |       |         |        |

---

Based on estimated marginal means

a. Adjustment for multiple comparisons: Bonferroni.

---

**Supplementary Table 7. Role-Emotional score pairwise comparisons**

| Day | (I) group | (J) group | Mean                 |            | Sig. <sup>a</sup> | 95% Confidence Interval for |             |
|-----|-----------|-----------|----------------------|------------|-------------------|-----------------------------|-------------|
|     |           |           | Difference (I-<br>J) | Std. Error |                   | Difference <sup>a</sup>     |             |
|     |           |           |                      |            |                   | Lower Bound                 | Upper Bound |
| 0   | A         | B         | 4.386                | 10.562     | 0.680             | -16.978                     | 25.750      |
|     | B         | A         | -4.386               | 10.562     | 0.680             | -25.750                     | 16.978      |
| 1   | A         | B         | 16.986               | 9.967      | 0.096             | -3.174                      | 37.145      |
|     | B         | A         | -16.986              | 9.967      | 0.096             | -37.145                     | 3.174       |
| 2   | A         | B         | 10.686               | 10.729     | 0.325             | -11.017                     | 32.388      |
|     | B         | A         | -10.686              | 10.729     | 0.325             | -32.388                     | 11.017      |
| 3   | A         | B         | 12.679               | 11.396     | 0.273             | -10.372                     | 35.731      |
|     | B         | A         | -12.679              | 11.396     | 0.273             | -35.731                     | 10.372      |
| 7   | A         | B         | 8.453                | 9.018      | 0.354             | -9.787                      | 26.693      |
|     | B         | A         | -8.453               | 9.018      | 0.354             | -26.693                     | 9.787       |
| 14  | A         | B         | 4.147                | 10.317     | 0.690             | -16.720                     | 25.014      |
|     | B         | A         | -4.147               | 10.317     | 0.690             | -25.014                     | 16.720      |
| 21  | A         | B         | 11.244               | 7.720      | 0.153             | -4.371                      | 26.859      |
|     | B         | A         | -11.244              | 7.720      | 0.153             | -26.859                     | 4.371       |
| 28  | A         | B         | 9.490                | 8.056      | 0.246             | -6.805                      | 25.784      |
|     | B         | A         | -9.490               | 8.056      | 0.246             | -25.784                     | 6.805       |

  

| group | (I) day | (J) day | Mean                 |            | Sig. <sup>a</sup> | 95% Confidence Interval for |             |
|-------|---------|---------|----------------------|------------|-------------------|-----------------------------|-------------|
|       |         |         | Difference (I-<br>J) | Std. Error |                   | Difference <sup>a</sup>     |             |
|       |         |         |                      |            |                   | Lower Bound                 | Upper Bound |
| A     | 0       | 1       | -9.091               | 5.356      | 1.000             | -27.052                     | 8.870       |
|       |         | 2       | -4.545               | 4.187      | 1.000             | -18.587                     | 9.496       |
|       |         | 3       | -3.030               | 4.601      | 1.000             | -18.458                     | 12.398      |
|       |         | 7       | -7.576               | 5.295      | 1.000             | -25.333                     | 10.182      |
|       |         | 14      | -1.515               | 7.710      | 1.000             | -27.370                     | 24.339      |

---

|   |    |         |       |       |         |        |
|---|----|---------|-------|-------|---------|--------|
|   | 21 | -12.121 | 5.760 | 1.000 | -31.436 | 7.193  |
|   | 28 | -12.121 | 7.570 | 1.000 | -37.506 | 13.264 |
|   | 0  | 9.091   | 5.356 | 1.000 | -8.870  | 27.052 |
| 1 | 2  | 4.545   | 4.187 | 1.000 | -9.496  | 18.587 |
|   | 3  | 6.061   | 4.857 | 1.000 | -10.228 | 22.350 |
|   | 7  | 1.515   | 5.103 | 1.000 | -15.599 | 18.629 |
|   | 14 | 7.576   | 7.051 | 1.000 | -16.069 | 31.220 |
|   | 21 | -3.030  | 4.761 | 1.000 | -18.995 | 12.935 |
|   | 28 | -3.030  | 7.542 | 1.000 | -28.322 | 22.261 |
|   | 0  | 4.545   | 4.187 | 1.000 | -9.496  | 18.587 |
| 2 | 1  | -4.545  | 4.187 | 1.000 | -18.587 | 9.496  |
|   | 3  | 1.515   | 3.365 | 1.000 | -9.769  | 12.800 |
|   | 7  | -3.030  | 5.379 | 1.000 | -21.069 | 15.008 |
|   | 14 | 3.030   | 6.979 | 1.000 | -20.372 | 26.433 |
|   | 21 | -7.576  | 5.692 | 1.000 | -26.665 | 11.513 |
|   | 28 | -7.576  | 7.510 | 1.000 | -32.759 | 17.607 |
|   | 0  | 3.030   | 4.601 | 1.000 | -12.398 | 18.458 |
| 3 | 1  | -6.061  | 4.857 | 1.000 | -22.350 | 10.228 |
|   | 2  | -1.515  | 3.365 | 1.000 | -12.800 | 9.769  |
|   | 7  | -4.545  | 4.591 | 1.000 | -19.941 | 10.850 |
|   | 14 | 1.515   | 6.245 | 1.000 | -19.426 | 22.456 |
|   | 21 | -9.091  | 5.629 | 1.000 | -27.968 | 9.786  |
|   | 28 | -9.091  | 7.267 | 1.000 | -33.462 | 15.280 |
|   | 0  | 7.576   | 5.295 | 1.000 | -10.182 | 25.333 |
| 7 | 1  | -1.515  | 5.103 | 1.000 | -18.629 | 15.599 |
|   | 2  | 3.030   | 5.379 | 1.000 | -15.008 | 21.069 |
|   | 3  | 4.545   | 4.591 | 1.000 | -10.850 | 19.941 |
|   | 14 | 6.061   | 5.364 | 1.000 | -11.928 | 24.049 |
|   | 21 | -4.545  | 2.678 | 1.000 | -13.526 | 4.435  |

---

---

|  |    |    |         |       |       |         |        |
|--|----|----|---------|-------|-------|---------|--------|
|  |    | 28 | -4.545  | 5.845 | 1.000 | -24.146 | 15.055 |
|  |    | 0  | 1.515   | 7.710 | 1.000 | -24.339 | 27.370 |
|  | 14 | 1  | -7.576  | 7.051 | 1.000 | -31.220 | 16.069 |
|  |    | 2  | -3.030  | 6.979 | 1.000 | -26.433 | 20.372 |
|  |    | 3  | -1.515  | 6.245 | 1.000 | -22.456 | 19.426 |
|  |    | 7  | -6.061  | 5.364 | 1.000 | -24.049 | 11.928 |
|  |    | 21 | -10.606 | 4.903 | 1.000 | -27.047 | 5.835  |
|  |    | 28 | -10.606 | 5.493 | 1.000 | -29.026 | 7.814  |
|  |    | 0  | 12.121  | 5.760 | 1.000 | -7.193  | 31.436 |
|  | 21 | 1  | 3.030   | 4.761 | 1.000 | -12.935 | 18.995 |
|  |    | 2  | 7.576   | 5.692 | 1.000 | -11.513 | 26.665 |
|  |    | 3  | 9.091   | 5.629 | 1.000 | -9.786  | 27.968 |
|  |    | 7  | 4.545   | 2.678 | 1.000 | -4.435  | 13.526 |
|  |    | 14 | 10.606  | 4.903 | 1.000 | -5.835  | 27.047 |
|  |    | 28 | 0.000   | 4.953 | 1.000 | -16.611 | 16.611 |
|  |    | 0  | 12.121  | 7.570 | 1.000 | -13.264 | 37.506 |
|  | 28 | 1  | 3.030   | 7.542 | 1.000 | -22.261 | 28.322 |
|  |    | 2  | 7.576   | 7.510 | 1.000 | -17.607 | 32.759 |
|  |    | 3  | 9.091   | 7.267 | 1.000 | -15.280 | 33.462 |
|  |    | 7  | 4.545   | 5.845 | 1.000 | -15.055 | 24.146 |
|  |    | 14 | 10.606  | 5.493 | 1.000 | -7.814  | 29.026 |
|  |    | 21 | 0.000   | 4.953 | 1.000 | -16.611 | 16.611 |
|  | 0  | 1  | 3.509   | 5.764 | 1.000 | -15.819 | 22.836 |
|  |    | 2  | 1.754   | 4.506 | 1.000 | -13.355 | 16.863 |
|  |    | 3  | 5.263   | 4.951 | 1.000 | -11.338 | 21.864 |
|  |    | 7  | -3.509  | 5.698 | 1.000 | -22.617 | 15.599 |
|  |    | 14 | -1.754  | 8.296 | 1.000 | -29.575 | 26.067 |
|  |    | 21 | -5.263  | 6.198 | 1.000 | -26.047 | 15.521 |
|  |    | 28 | -7.018  | 8.146 | 1.000 | -34.333 | 20.298 |

---

B

---

|    |    |         |       |       |         |        |
|----|----|---------|-------|-------|---------|--------|
|    | 0  | -3.509  | 5.764 | 1.000 | -22.836 | 15.819 |
| 1  | 2  | -1.754  | 4.506 | 1.000 | -16.863 | 13.355 |
|    | 3  | 1.754   | 5.227 | 1.000 | -15.774 | 19.282 |
|    | 7  | -7.018  | 5.492 | 1.000 | -25.433 | 11.398 |
|    | 14 | -5.263  | 7.587 | 1.000 | -30.706 | 20.180 |
|    | 21 | -8.772  | 5.123 | 1.000 | -25.951 | 8.407  |
|    | 28 | -10.526 | 8.116 | 1.000 | -37.741 | 16.688 |
|    | 0  | -1.754  | 4.506 | 1.000 | -16.863 | 13.355 |
| 2  | 1  | 1.754   | 4.506 | 1.000 | -13.355 | 16.863 |
|    | 3  | 3.509   | 3.621 | 1.000 | -8.634  | 15.651 |
|    | 7  | -5.263  | 5.788 | 1.000 | -24.674 | 14.148 |
|    | 14 | -3.509  | 7.509 | 1.000 | -28.691 | 21.673 |
|    | 21 | -7.018  | 6.125 | 1.000 | -27.558 | 13.523 |
|    | 28 | -8.772  | 8.081 | 1.000 | -35.870 | 18.326 |
|    | 0  | -5.263  | 4.951 | 1.000 | -21.864 | 11.338 |
| 3  | 1  | -1.754  | 5.227 | 1.000 | -19.282 | 15.774 |
|    | 2  | -3.509  | 3.621 | 1.000 | -15.651 | 8.634  |
|    | 7  | -8.772  | 4.940 | 1.000 | -25.338 | 7.794  |
|    | 14 | -7.018  | 6.720 | 1.000 | -29.551 | 15.516 |
|    | 21 | -10.526 | 6.057 | 1.000 | -30.839 | 9.786  |
|    | 28 | -12.281 | 7.820 | 1.000 | -38.505 | 13.944 |
|    | 0  | 3.509   | 5.698 | 1.000 | -15.599 | 22.617 |
| 7  | 1  | 7.018   | 5.492 | 1.000 | -11.398 | 25.433 |
|    | 2  | 5.263   | 5.788 | 1.000 | -14.148 | 24.674 |
|    | 3  | 8.772   | 4.940 | 1.000 | -7.794  | 25.338 |
|    | 14 | 1.754   | 5.772 | 1.000 | -17.602 | 21.111 |
|    | 21 | -1.754  | 2.882 | 1.000 | -11.418 | 7.909  |
|    | 28 | -3.509  | 6.289 | 1.000 | -24.600 | 17.582 |
| 14 | 0  | 1.754   | 8.296 | 1.000 | -26.067 | 29.575 |

---

---

|    |    |        |       |       |         |        |
|----|----|--------|-------|-------|---------|--------|
|    | 1  | 5.263  | 7.587 | 1.000 | -20.180 | 30.706 |
|    | 2  | 3.509  | 7.509 | 1.000 | -21.673 | 28.691 |
|    | 3  | 7.018  | 6.720 | 1.000 | -15.516 | 29.551 |
|    | 7  | -1.754 | 5.772 | 1.000 | -21.111 | 17.602 |
|    | 21 | -3.509 | 5.276 | 1.000 | -21.201 | 14.183 |
|    | 28 | -5.263 | 5.911 | 1.000 | -25.084 | 14.558 |
|    | 0  | 5.263  | 6.198 | 1.000 | -15.521 | 26.047 |
| 21 | 1  | 8.772  | 5.123 | 1.000 | -8.407  | 25.951 |
|    | 2  | 7.018  | 6.125 | 1.000 | -13.523 | 27.558 |
|    | 3  | 10.526 | 6.057 | 1.000 | -9.786  | 30.839 |
|    | 7  | 1.754  | 2.882 | 1.000 | -7.909  | 11.418 |
|    | 14 | 3.509  | 5.276 | 1.000 | -14.183 | 21.201 |
|    | 28 | -1.754 | 5.330 | 1.000 | -19.629 | 16.120 |
|    | 0  | 7.018  | 8.146 | 1.000 | -20.298 | 34.333 |
| 28 | 1  | 10.526 | 8.116 | 1.000 | -16.688 | 37.741 |
|    | 2  | 8.772  | 8.081 | 1.000 | -18.326 | 35.870 |
|    | 3  | 12.281 | 7.820 | 1.000 | -13.944 | 38.505 |
|    | 7  | 3.509  | 6.289 | 1.000 | -17.582 | 24.600 |
|    | 14 | 5.263  | 5.911 | 1.000 | -14.558 | 25.084 |
|    | 21 | 1.754  | 5.330 | 1.000 | -16.120 | 19.629 |

---

Based on estimated marginal means

a. Adjustment for multiple comparisons: Bonferroni.

---

**Supplementary Table 8. Bodily pain score pairwise comparisons**

| Day | (I) group | (J) group | Mean                 |            | Sig. <sup>a</sup> | 95% Confidence Interval for |             |
|-----|-----------|-----------|----------------------|------------|-------------------|-----------------------------|-------------|
|     |           |           | Difference (I-<br>J) | Std. Error |                   | Difference <sup>a</sup>     |             |
|     |           |           |                      |            |                   | Lower Bound                 | Upper Bound |
| 0   | A         | B         | 3.618                | 3.471      | 0.304             | -3.402                      | 10.639      |
|     | B         | A         | -3.618               | 3.471      | 0.304             | -10.639                     | 3.402       |
| 1   | A         | B         | 3.050                | 3.468      | 0.385             | -3.965                      | 10.066      |
|     | B         | A         | -3.050               | 3.468      | 0.385             | -10.066                     | 3.965       |
| 2   | A         | B         | 0.778                | 4.500      | 0.864             | -8.324                      | 9.879       |
|     | B         | A         | -0.778               | 4.500      | 0.864             | -9.879                      | 8.324       |
| 3   | A         | B         | 0.598                | 4.307      | 0.890             | -8.113                      | 9.309       |
|     | B         | A         | -0.598               | 4.307      | 0.890             | -9.309                      | 8.113       |
| 7   | A         | B         | 4.934                | 3.275      | 0.140             | -1.690                      | 11.558      |
|     | B         | A         | -4.934               | 3.275      | 0.140             | -11.558                     | 1.690       |
| 14  | A         | B         | .867                 | 4.361      | 0.843             | -7.953                      | 9.688       |
|     | B         | A         | -0.867               | 4.361      | 0.843             | -9.688                      | 7.953       |
| 21  | A         | B         | -2.333               | 4.419      | 0.601             | -11.271                     | 6.606       |
|     | B         | A         | 2.333                | 4.419      | 0.601             | -6.606                      | 11.271      |
| 28  | A         | B         | 3.349                | 3.405      | 0.331             | -3.539                      | 10.238      |
|     | B         | A         | -3.349               | 3.405      | 0.331             | -10.238                     | 3.539       |

  

| group | (I) day | (J) day | Mean                 |            | Sig. <sup>a</sup> | 95% Confidence Interval for |             |
|-------|---------|---------|----------------------|------------|-------------------|-----------------------------|-------------|
|       |         |         | Difference (I-<br>J) | Std. Error |                   | Difference <sup>a</sup>     |             |
|       |         |         |                      |            |                   | Lower Bound                 | Upper Bound |
| A     | 0       | 1       | 0.568                | 1.858      | 1.000             | -5.662                      | 6.798       |
|       |         | 2       | 2.841                | 2.170      | 1.000             | -4.437                      | 10.119      |
|       |         | 3       | 1.705                | 1.927      | 1.000             | -4.756                      | 8.165       |
|       |         | 7       | 0.000                | 1.465      | 1.000             | -4.914                      | 4.914       |
|       |         | 14      | 3.409                | 2.388      | 1.000             | -4.598                      | 11.417      |

---

|   |    |        |       |       |         |        |
|---|----|--------|-------|-------|---------|--------|
|   | 21 | 3.977  | 2.742 | 1.000 | -5.219  | 13.174 |
|   | 28 | -1.705 | 2.380 | 1.000 | -9.687  | 6.278  |
|   | 0  | -0.568 | 1.858 | 1.000 | -6.798  | 5.662  |
| 1 | 2  | 2.273  | 1.873 | 1.000 | -4.010  | 8.555  |
|   | 3  | 1.136  | 2.322 | 1.000 | -6.650  | 8.923  |
|   | 7  | -0.568 | 1.746 | 1.000 | -6.424  | 5.288  |
|   | 14 | 2.841  | 2.038 | 1.000 | -3.994  | 9.676  |
|   | 21 | 3.409  | 2.592 | 1.000 | -5.283  | 12.101 |
|   | 28 | -2.273 | 2.330 | 1.000 | -10.085 | 5.539  |
|   | 0  | -2.841 | 2.170 | 1.000 | -10.119 | 4.437  |
| 2 | 1  | -2.273 | 1.873 | 1.000 | -8.555  | 4.010  |
|   | 3  | -1.136 | 1.791 | 1.000 | -7.141  | 4.869  |
|   | 7  | -2.841 | 1.688 | 1.000 | -8.503  | 2.821  |
|   | 14 | 0.568  | 2.172 | 1.000 | -6.715  | 7.851  |
|   | 21 | 1.136  | 2.427 | 1.000 | -7.002  | 9.275  |
|   | 28 | -4.545 | 2.474 | 1.000 | -12.843 | 3.752  |
|   | 0  | -1.705 | 1.927 | 1.000 | -8.165  | 4.756  |
| 3 | 1  | -1.136 | 2.322 | 1.000 | -8.923  | 6.650  |
|   | 2  | 1.136  | 1.791 | 1.000 | -4.869  | 7.141  |
|   | 7  | -1.705 | 1.463 | 1.000 | -6.610  | 3.201  |
|   | 14 | 1.705  | 2.456 | 1.000 | -6.531  | 9.940  |
|   | 21 | 2.273  | 2.346 | 1.000 | -5.594  | 10.140 |
|   | 28 | -3.409 | 2.147 | 1.000 | -10.609 | 3.790  |
|   | 0  | 0.000  | 1.465 | 1.000 | -4.914  | 4.914  |
| 7 | 1  | 0.568  | 1.746 | 1.000 | -5.288  | 6.424  |
|   | 2  | 2.841  | 1.688 | 1.000 | -2.821  | 8.503  |
|   | 3  | 1.705  | 1.463 | 1.000 | -3.201  | 6.610  |
|   | 14 | 3.409  | 2.060 | 1.000 | -3.500  | 10.318 |
|   | 21 | 3.977  | 2.195 | 1.000 | -3.383  | 11.338 |

---

---

|  |    |    |           |       |       |         |        |
|--|----|----|-----------|-------|-------|---------|--------|
|  |    | 28 | -1.705    | 1.922 | 1.000 | -8.148  | 4.739  |
|  |    | 0  | -3.409    | 2.388 | 1.000 | -11.417 | 4.598  |
|  | 14 | 1  | -2.841    | 2.038 | 1.000 | -9.676  | 3.994  |
|  |    | 2  | -0.568    | 2.172 | 1.000 | -7.851  | 6.715  |
|  |    | 3  | -1.705    | 2.456 | 1.000 | -9.940  | 6.531  |
|  |    | 7  | -3.409    | 2.060 | 1.000 | -10.318 | 3.500  |
|  |    | 21 | 0.568     | 1.713 | 1.000 | -5.176  | 6.312  |
|  |    | 28 | -5.114    | 2.023 | 0.438 | -11.898 | 1.671  |
|  |    | 0  | -3.977    | 2.742 | 1.000 | -13.174 | 5.219  |
|  | 21 | 1  | -3.409    | 2.592 | 1.000 | -12.101 | 5.283  |
|  |    | 2  | -1.136    | 2.427 | 1.000 | -9.275  | 7.002  |
|  |    | 3  | -2.273    | 2.346 | 1.000 | -10.140 | 5.594  |
|  |    | 7  | -3.977    | 2.195 | 1.000 | -11.338 | 3.383  |
|  |    | 14 | -0.568    | 1.713 | 1.000 | -6.312  | 5.176  |
|  |    | 28 | -5.682    | 1.783 | 0.079 | -11.661 | 0.297  |
|  |    | 0  | 1.705     | 2.380 | 1.000 | -6.278  | 9.687  |
|  | 28 | 1  | 2.273     | 2.330 | 1.000 | -5.539  | 10.085 |
|  |    | 2  | 4.545     | 2.474 | 1.000 | -3.752  | 12.843 |
|  |    | 3  | 3.409     | 2.147 | 1.000 | -3.790  | 10.609 |
|  |    | 7  | 1.705     | 1.922 | 1.000 | -4.739  | 8.148  |
|  |    | 14 | 5.114     | 2.023 | .438  | -1.671  | 11.898 |
|  |    | 21 | 5.682     | 1.783 | 0.079 | -0.297  | 11.661 |
|  |    | 1  | 1.421E-14 | 1.999 | 1.000 | -6.704  | 6.704  |
|  | 0  | 2  | 1.421E-14 | 2.335 | 1.000 | -7.831  | 7.831  |
|  |    | 3  | -1.316    | 2.073 | 1.000 | -8.268  | 5.636  |
|  |    | 7  | 1.316     | 1.577 | 1.000 | -3.972  | 6.603  |
|  |    | 14 | 0.658     | 2.570 | 1.000 | -7.959  | 9.274  |
|  |    | 21 | -1.974    | 2.951 | 1.000 | -11.870 | 7.922  |
|  |    | 28 | -1.974    | 2.562 | 1.000 | -10.564 | 6.616  |

---

B

---

|    |    |            |       |       |         |        |
|----|----|------------|-------|-------|---------|--------|
|    | 0  | -1.421E-14 | 1.999 | 1.000 | -6.704  | 6.704  |
| 1  | 2  | 0.000      | 2.016 | 1.000 | -6.760  | 6.760  |
|    | 3  | -1.316     | 2.499 | 1.000 | -9.695  | 7.063  |
|    | 7  | 1.316      | 1.879 | 1.000 | -4.985  | 7.617  |
|    | 14 | 0.658      | 2.193 | 1.000 | -6.697  | 8.013  |
|    | 21 | -1.974     | 2.789 | 1.000 | -11.326 | 7.379  |
|    | 28 | -1.974     | 2.507 | 1.000 | -10.380 | 6.432  |
|    | 0  | -1.421E-14 | 2.335 | 1.000 | -7.831  | 7.831  |
| 2  | 1  | 0.000      | 2.016 | 1.000 | -6.760  | 6.760  |
|    | 3  | -1.316     | 1.927 | 1.000 | -7.777  | 5.146  |
|    | 7  | 1.316      | 1.817 | 1.000 | -4.777  | 7.408  |
|    | 14 | 0.658      | 2.337 | 1.000 | -7.179  | 8.495  |
|    | 21 | -1.974     | 2.612 | 1.000 | -10.731 | 6.784  |
|    | 28 | -1.974     | 2.662 | 1.000 | -10.902 | 6.955  |
|    | 0  | 1.316      | 2.073 | 1.000 | -5.636  | 8.268  |
| 3  | 1  | 1.316      | 2.499 | 1.000 | -7.063  | 9.695  |
|    | 2  | 1.316      | 1.927 | 1.000 | -5.146  | 7.777  |
|    | 7  | 2.632      | 1.574 | 1.000 | -2.647  | 7.910  |
|    | 14 | 1.974      | 2.643 | 1.000 | -6.888  | 10.835 |
|    | 21 | -0.658     | 2.524 | 1.000 | -9.123  | 7.807  |
|    | 28 | -0.658     | 2.310 | 1.000 | -8.405  | 7.089  |
|    | 0  | -1.316     | 1.577 | 1.000 | -6.603  | 3.972  |
| 7  | 1  | -1.316     | 1.879 | 1.000 | -7.617  | 4.985  |
|    | 2  | -1.316     | 1.817 | 1.000 | -7.408  | 4.777  |
|    | 3  | -2.632     | 1.574 | 1.000 | -7.910  | 2.647  |
|    | 14 | -0.658     | 2.217 | 1.000 | -8.093  | 6.777  |
|    | 21 | -3.289     | 2.362 | 1.000 | -11.210 | 4.631  |
|    | 28 | -3.289     | 2.068 | 1.000 | -10.223 | 3.644  |
| 14 | 0  | -0.658     | 2.570 | 1.000 | -9.274  | 7.959  |

---

---

|    |    |        |       |       |         |        |
|----|----|--------|-------|-------|---------|--------|
|    | 1  | -0.658 | 2.193 | 1.000 | -8.013  | 6.697  |
|    | 2  | -0.658 | 2.337 | 1.000 | -8.495  | 7.179  |
|    | 3  | -1.974 | 2.643 | 1.000 | -10.835 | 6.888  |
|    | 7  | 0.658  | 2.217 | 1.000 | -6.777  | 8.093  |
|    | 21 | -2.632 | 1.843 | 1.000 | -8.813  | 3.550  |
|    | 28 | -2.632 | 2.177 | 1.000 | -9.932  | 4.669  |
|    | 0  | 1.974  | 2.951 | 1.000 | -7.922  | 11.870 |
| 21 | 1  | 1.974  | 2.789 | 1.000 | -7.379  | 11.326 |
|    | 2  | 1.974  | 2.612 | 1.000 | -6.784  | 10.731 |
|    | 3  | 0.658  | 2.524 | 1.000 | -7.807  | 9.123  |
|    | 7  | 3.289  | 2.362 | 1.000 | -4.631  | 11.210 |
|    | 14 | 2.632  | 1.843 | 1.000 | -3.550  | 8.813  |
|    | 28 | 0.000  | 1.918 | 1.000 | -6.433  | 6.433  |
|    | 0  | 1.974  | 2.562 | 1.000 | -6.616  | 10.564 |
| 28 | 1  | 1.974  | 2.507 | 1.000 | -6.432  | 10.380 |
|    | 2  | 1.974  | 2.662 | 1.000 | -6.955  | 10.902 |
|    | 3  | 0.658  | 2.310 | 1.000 | -7.089  | 8.405  |
|    | 7  | 3.289  | 2.068 | 1.000 | -3.644  | 10.223 |
|    | 14 | 2.632  | 2.177 | 1.000 | -4.669  | 9.932  |
|    | 21 | 0.000  | 1.918 | 1.000 | -6.433  | 6.433  |

---

Based on estimated marginal means

a. Adjustment for multiple comparisons: Bonferroni.

---

**Supplementary Table 9. Vitality score pairwise comparisons**

| Day | (I) group | (J) group | Mean                 |            | Sig. <sup>a</sup> | 95% Confidence Interval for |             |
|-----|-----------|-----------|----------------------|------------|-------------------|-----------------------------|-------------|
|     |           |           | Difference (I-<br>J) | Std. Error |                   | Difference <sup>a</sup>     |             |
|     |           |           |                      |            |                   | Lower Bound                 | Upper Bound |
| 0   | A         | B         | 3.242                | 3.856      | 0.406             | -4.558                      | 11.041      |
|     | B         | A         | -3.242               | 3.856      | 0.406             | -11.041                     | 4.558       |
| 1   | A         | B         | 0.933                | 4.041      | 0.819             | -7.240                      | 9.106       |
|     | B         | A         | -0.933               | 4.041      | 0.819             | -9.106                      | 7.240       |
| 2   | A         | B         | -0.526               | 4.690      | 0.911             | -10.012                     | 8.959       |
|     | B         | A         | 0.526                | 4.690      | 0.911             | -8.959                      | 10.012      |
| 3   | A         | B         | 1.483                | 4.386      | 0.737             | -7.389                      | 10.355      |
|     | B         | A         | -1.483               | 4.386      | 0.737             | -10.355                     | 7.389       |
| 7   | A         | B         | 3.756                | 4.446      | 0.403             | -5.236                      | 12.748      |
|     | B         | A         | -3.756               | 4.446      | 0.403             | -12.748                     | 5.236       |
| 14  | A         | B         | 4.868                | 4.915      | 0.328             | -5.074                      | 14.810      |
|     | B         | A         | -4.868               | 4.915      | 0.328             | -14.810                     | 5.074       |
| 21  | A         | B         | 4.617                | 4.521      | 0.313             | -4.527                      | 13.762      |
|     | B         | A         | -4.617               | 4.521      | 0.313             | -13.762                     | 4.527       |
| 28  | A         | B         | 7.679                | 4.285      | 0.081             | -0.988                      | 16.347      |
|     | B         | A         | -7.679               | 4.285      | 0.081             | -16.347                     | .988        |

  

| group | (I) day | (J) day | Mean                 |            | Sig. <sup>b</sup> | 95% Confidence Interval for |             |
|-------|---------|---------|----------------------|------------|-------------------|-----------------------------|-------------|
|       |         |         | Difference (I-<br>J) | Std. Error |                   | Difference <sup>b</sup>     |             |
|       |         |         |                      |            |                   | Lower Bound                 | Upper Bound |
| A     | 0       | 1       | 2.045                | 2.240      | 1.000             | -5.468                      | 9.558       |
|       |         | 2       | 1.136                | 2.294      | 1.000             | -6.556                      | 8.829       |
|       |         | 3       | -1.136               | 2.393      | 1.000             | -9.160                      | 6.888       |
|       |         | 7       | -3.409               | 2.422      | 1.000             | -11.533                     | 4.714       |
|       |         | 14      | -1.364               | 2.618      | 1.000             | -10.144                     | 7.417       |

---

|   |    |         |       |       |         |        |
|---|----|---------|-------|-------|---------|--------|
|   | 21 | -2.955  | 2.435 | 1.000 | -11.119 | 5.210  |
|   | 28 | -5.227  | 2.312 | 0.824 | -12.981 | 2.526  |
|   | 0  | -2.045  | 2.240 | 1.000 | -9.558  | 5.468  |
| 1 | 2  | -0.909  | 2.402 | 1.000 | -8.964  | 7.146  |
|   | 3  | -3.182  | 1.869 | 1.000 | -9.448  | 3.084  |
|   | 7  | -5.455  | 1.859 | 0.156 | -11.687 | 0.778  |
|   | 14 | -3.409  | 2.242 | 1.000 | -10.929 | 4.110  |
|   | 21 | -5.000  | 2.046 | 0.537 | -11.861 | 1.861  |
|   | 28 | -7.273* | 2.043 | 0.028 | -14.124 | -0.422 |
|   | 0  | -1.136  | 2.294 | 1.000 | -8.829  | 6.556  |
| 2 | 1  | .909    | 2.402 | 1.000 | -7.146  | 8.964  |
|   | 3  | -2.273  | 1.842 | 1.000 | -8.449  | 3.903  |
|   | 7  | -4.545  | 1.876 | 0.564 | -10.836 | 1.745  |
|   | 14 | -2.500  | 1.962 | 1.000 | -9.080  | 4.080  |
|   | 21 | -4.091  | 2.149 | 1.000 | -11.296 | 3.114  |
|   | 28 | -6.364  | 2.151 | 0.146 | -13.577 | 0.849  |
|   | 0  | 1.136   | 2.393 | 1.000 | -6.888  | 9.160  |
| 3 | 1  | 3.182   | 1.869 | 1.000 | -3.084  | 9.448  |
|   | 2  | 2.273   | 1.842 | 1.000 | -3.903  | 8.449  |
|   | 7  | -2.273  | 1.072 | 1.000 | -5.868  | 1.323  |
|   | 14 | -0.227  | 1.521 | 1.000 | -5.327  | 4.873  |
|   | 21 | -1.818  | 1.876 | 1.000 | -8.109  | 4.473  |
|   | 28 | -4.091  | 1.723 | 0.633 | -9.869  | 1.688  |
|   | 0  | 3.409   | 2.422 | 1.000 | -4.714  | 11.533 |
| 7 | 1  | 5.455   | 1.859 | 0.156 | -0.778  | 11.687 |
|   | 2  | 4.545   | 1.876 | 0.564 | -1.745  | 10.836 |
|   | 3  | 2.273   | 1.072 | 1.000 | -1.323  | 5.868  |
|   | 14 | 2.045   | 1.505 | 1.000 | -3.002  | 7.092  |
|   | 21 | 0.455   | 1.720 | 1.000 | -5.312  | 6.222  |

---

|  |    |    |        |       |       |         |        |
|--|----|----|--------|-------|-------|---------|--------|
|  |    | 28 | -1.818 | 1.820 | 1.000 | -7.922  | 4.286  |
|  |    | 0  | 1.364  | 2.618 | 1.000 | -7.417  | 10.144 |
|  | 14 | 1  | 3.409  | 2.242 | 1.000 | -4.110  | 10.929 |
|  |    | 2  | 2.500  | 1.962 | 1.000 | -4.080  | 9.080  |
|  |    | 3  | 0.227  | 1.521 | 1.000 | -4.873  | 5.327  |
|  |    | 7  | -2.045 | 1.505 | 1.000 | -7.092  | 3.002  |
|  |    | 21 | -1.591 | 1.630 | 1.000 | -7.057  | 3.875  |
|  |    | 28 | -3.864 | 1.799 | 1.000 | -9.895  | 2.168  |
|  |    | 0  | 2.955  | 2.435 | 1.000 | -5.210  | 11.119 |
|  | 21 | 1  | 5.000  | 2.046 | 0.537 | -1.861  | 11.861 |
|  |    | 2  | 4.091  | 2.149 | 1.000 | -3.114  | 11.296 |
|  |    | 3  | 1.818  | 1.876 | 1.000 | -4.473  | 8.109  |
|  |    | 7  | -0.455 | 1.720 | 1.000 | -6.222  | 5.312  |
|  |    | 14 | 1.591  | 1.630 | 1.000 | -3.875  | 7.057  |
|  |    | 28 | -2.273 | 1.488 | 1.000 | -7.262  | 2.717  |
|  |    | 0  | 5.227  | 2.312 | 0.824 | -2.526  | 12.981 |
|  | 28 | 1  | 7.273* | 2.043 | 0.028 | 0.422   | 14.124 |
|  |    | 2  | 6.364  | 2.151 | 0.146 | -0.849  | 13.577 |
|  |    | 3  | 4.091  | 1.723 | 0.633 | -1.688  | 9.869  |
|  |    | 7  | 1.818  | 1.820 | 1.000 | -4.286  | 7.922  |
|  |    | 14 | 3.864  | 1.799 | 1.000 | -2.168  | 9.895  |
|  |    | 21 | 2.273  | 1.488 | 1.000 | -2.717  | 7.262  |
|  |    | 1  | -0.263 | 2.411 | 1.000 | -8.348  | 7.821  |
|  | 0  | 2  | -2.632 | 2.468 | 1.000 | -10.909 | 5.646  |
|  |    | 3  | -2.895 | 2.575 | 1.000 | -11.529 | 5.739  |
|  |    | 7  | -2.895 | 2.607 | 1.000 | -11.636 | 5.847  |
|  |    | 14 | 0.263  | 2.818 | 1.000 | -9.185  | 9.712  |
|  |    | 21 | -1.579 | 2.620 | 1.000 | -10.364 | 7.206  |
|  |    | 28 | -0.789 | 2.488 | 1.000 | -9.133  | 7.554  |

---

|    |    |        |       |       |         |        |
|----|----|--------|-------|-------|---------|--------|
|    | 0  | 0.263  | 2.411 | 1.000 | -7.821  | 8.348  |
| 1  | 2  | -2.368 | 2.585 | 1.000 | -11.036 | 6.299  |
|    | 3  | -2.632 | 2.011 | 1.000 | -9.374  | 4.111  |
|    | 7  | -2.632 | 2.000 | 1.000 | -9.338  | 4.075  |
|    | 14 | 0.526  | 2.413 | 1.000 | -7.565  | 8.618  |
|    | 21 | -1.316 | 2.202 | 1.000 | -8.699  | 6.068  |
|    | 28 | -0.526 | 2.198 | 1.000 | -7.898  | 6.846  |
|    | 0  | 2.632  | 2.468 | 1.000 | -5.646  | 10.909 |
| 2  | 1  | 2.368  | 2.585 | 1.000 | -6.299  | 11.036 |
|    | 3  | -0.263 | 1.982 | 1.000 | -6.909  | 6.382  |
|    | 7  | -0.263 | 2.019 | 1.000 | -7.032  | 6.506  |
|    | 14 | 2.895  | 2.111 | 1.000 | -4.186  | 9.975  |
|    | 21 | 1.053  | 2.312 | 1.000 | -6.700  | 8.806  |
|    | 28 | 1.842  | 2.315 | 1.000 | -5.920  | 9.604  |
|    | 0  | 2.895  | 2.575 | 1.000 | -5.739  | 11.529 |
| 3  | 1  | 2.632  | 2.011 | 1.000 | -4.111  | 9.374  |
|    | 2  | 0.263  | 1.982 | 1.000 | -6.382  | 6.909  |
|    | 7  | 0.000  | 1.154 | 1.000 | -3.869  | 3.869  |
|    | 14 | 3.158  | 1.636 | 1.000 | -2.330  | 8.646  |
|    | 21 | 1.316  | 2.019 | 1.000 | -5.453  | 8.085  |
|    | 28 | 2.105  | 1.854 | 1.000 | -4.113  | 8.323  |
|    | 0  | 2.895  | 2.607 | 1.000 | -5.847  | 11.636 |
| 7  | 1  | 2.632  | 2.000 | 1.000 | -4.075  | 9.338  |
|    | 2  | 0.263  | 2.019 | 1.000 | -6.506  | 7.032  |
|    | 3  | 0.000  | 1.154 | 1.000 | -3.869  | 3.869  |
|    | 14 | 3.158  | 1.620 | 1.000 | -2.273  | 8.589  |
|    | 21 | 1.316  | 1.851 | 1.000 | -4.890  | 7.521  |
|    | 28 | 2.105  | 1.959 | 1.000 | -4.463  | 8.674  |
| 14 | 0  | -0.263 | 2.818 | 1.000 | -9.712  | 9.185  |

---

---

|    |    |        |       |       |        |        |
|----|----|--------|-------|-------|--------|--------|
|    | 1  | -0.526 | 2.413 | 1.000 | -8.618 | 7.565  |
|    | 2  | -2.895 | 2.111 | 1.000 | -9.975 | 4.186  |
|    | 3  | -3.158 | 1.636 | 1.000 | -8.646 | 2.330  |
|    | 7  | -3.158 | 1.620 | 1.000 | -8.589 | 2.273  |
|    | 21 | -1.842 | 1.754 | 1.000 | -7.724 | 4.040  |
|    | 28 | -1.053 | 1.935 | 1.000 | -7.543 | 5.437  |
|    | 0  | 1.579  | 2.620 | 1.000 | -7.206 | 10.364 |
| 21 | 1  | 1.316  | 2.202 | 1.000 | -6.068 | 8.699  |
|    | 2  | -1.053 | 2.312 | 1.000 | -8.806 | 6.700  |
|    | 3  | -1.316 | 2.019 | 1.000 | -8.085 | 5.453  |
|    | 7  | -1.316 | 1.851 | 1.000 | -7.521 | 4.890  |
|    | 14 | 1.842  | 1.754 | 1.000 | -4.040 | 7.724  |
|    | 28 | 0.789  | 1.601 | 1.000 | -4.580 | 6.159  |
|    | 0  | 0.789  | 2.488 | 1.000 | -7.554 | 9.133  |
| 28 | 1  | 0.526  | 2.198 | 1.000 | -6.846 | 7.898  |
|    | 2  | -1.842 | 2.315 | 1.000 | -9.604 | 5.920  |
|    | 3  | -2.105 | 1.854 | 1.000 | -8.323 | 4.113  |
|    | 7  | -2.105 | 1.959 | 1.000 | -8.674 | 4.463  |
|    | 14 | 1.053  | 1.935 | 1.000 | -5.437 | 7.543  |
|    | 21 | -0.789 | 1.601 | 1.000 | -6.159 | 4.580  |

---

Based on estimated marginal means

\*. The mean difference is significant at the .05 level.

b. Adjustment for multiple comparisons: Bonferroni.

---

**Supplementary Table 10. Mental health score pairwise comparisons**

| Day | (I) group | (J) group | Mean                 |            | Sig. <sup>a</sup> | 95% Confidence Interval for |             |
|-----|-----------|-----------|----------------------|------------|-------------------|-----------------------------|-------------|
|     |           |           | Difference (I-<br>J) | Std. Error |                   | Difference <sup>a</sup>     |             |
|     |           |           |                      |            |                   | Lower Bound                 | Upper Bound |
| 0   | A         | B         | -1.435               | 3.252      | 0.661             | -8.013                      | 5.142       |
|     | B         | A         | 1.435                | 3.252      | 0.661             | -5.142                      | 8.013       |
| 1   | A         | B         | 2.191                | 4.240      | 0.608             | -6.384                      | 10.767      |
|     | B         | A         | -2.191               | 4.240      | 0.608             | -10.767                     | 6.384       |
| 2   | A         | B         | 1.493                | 4.613      | 0.748             | -7.837                      | 10.823      |
|     | B         | A         | -1.493               | 4.613      | 0.748             | -10.823                     | 7.837       |
| 3   | A         | B         | 6.239                | 4.088      | 0.135             | -2.029                      | 14.507      |
|     | B         | A         | -6.239               | 4.088      | 0.135             | -14.507                     | 2.029       |
| 7   | A         | B         | 5.522                | 3.755      | 0.150             | -2.075                      | 13.118      |
|     | B         | A         | -5.522               | 3.755      | 0.150             | -13.118                     | 2.075       |
| 14  | A         | B         | 4.928                | 4.270      | 0.255             | -3.708                      | 13.564      |
|     | B         | A         | -4.928               | 4.270      | 0.255             | -13.564                     | 3.708       |
| 21  | A         | B         | 5.981                | 4.241      | 0.166             | -2.598                      | 14.560      |
|     | B         | A         | -5.981               | 4.241      | 0.166             | -14.560                     | 2.598       |
| 28  | A         | B         | 5.368                | 4.002      | 0.188             | -2.727                      | 13.463      |
|     | B         | A         | -5.368               | 4.002      | 0.188             | -13.463                     | 2.727       |

  

| group | (I) day | (J) day | Mean                 |            | Sig. <sup>a</sup> | 95% Confidence Interval for |             |
|-------|---------|---------|----------------------|------------|-------------------|-----------------------------|-------------|
|       |         |         | Difference (I-<br>J) | Std. Error |                   | Difference <sup>a</sup>     |             |
|       |         |         |                      |            |                   | Lower Bound                 | Upper Bound |
| A     | 0       | 1       | -2.364               | 2.339      | 1.000             | -10.208                     | 5.481       |
|       |         | 2       | -1.455               | 2.307      | 1.000             | -9.192                      | 6.283       |
|       |         | 3       | -4.727               | 2.477      | 1.000             | -13.033                     | 3.578       |
|       |         | 7       | -5.273               | 2.208      | 0.612             | -12.677                     | 2.131       |
|       |         | 14      | -6.364               | 2.701      | 0.661             | -15.422                     | 2.695       |
|       |         | 21      | -6.364               | 2.651      | 0.595             | -15.255                     | 2.528       |

---

|   |    |        |       |       |         |        |
|---|----|--------|-------|-------|---------|--------|
|   | 28 | -4.909 | 2.246 | 0.978 | -12.442 | 2.624  |
|   | 0  | 2.364  | 2.339 | 1.000 | -5.481  | 10.208 |
| 1 | 2  | .909   | 1.954 | 1.000 | -5.645  | 7.463  |
|   | 3  | -2.364 | 1.694 | 1.000 | -8.046  | 3.318  |
|   | 7  | -2.909 | 1.812 | 1.000 | -8.987  | 3.169  |
|   | 14 | -4.000 | 1.639 | 0.541 | -9.497  | 1.497  |
|   | 21 | -4.000 | 1.722 | 0.713 | -9.773  | 1.773  |
|   | 28 | -2.545 | 1.494 | 1.000 | -7.554  | 2.463  |
|   | 0  | 1.455  | 2.307 | 1.000 | -6.283  | 9.192  |
| 2 | 1  | -0.909 | 1.954 | 1.000 | -7.463  | 5.645  |
|   | 3  | -3.273 | 1.736 | 1.000 | -9.096  | 2.550  |
|   | 7  | -3.818 | 1.892 | 1.000 | -10.162 | 2.526  |
|   | 14 | -4.909 | 2.429 | 1.000 | -13.053 | 3.235  |
|   | 21 | -4.909 | 1.920 | 0.408 | -11.347 | 1.529  |
|   | 28 | -3.455 | 2.161 | 1.000 | -10.701 | 3.792  |
|   | 0  | 4.727  | 2.477 | 1.000 | -3.578  | 13.033 |
| 3 | 1  | 2.364  | 1.694 | 1.000 | -3.318  | 8.046  |
|   | 2  | 3.273  | 1.736 | 1.000 | -2.550  | 9.096  |
|   | 7  | -0.545 | 1.608 | 1.000 | -5.939  | 4.848  |
|   | 14 | -1.636 | 1.817 | 1.000 | -7.729  | 4.456  |
|   | 21 | -1.636 | 1.695 | 1.000 | -7.320  | 4.047  |
|   | 28 | -0.182 | 1.731 | 1.000 | -5.986  | 5.622  |
|   | 0  | 5.273  | 2.208 | 0.612 | -2.131  | 12.677 |
| 7 | 1  | 2.909  | 1.812 | 1.000 | -3.169  | 8.987  |
|   | 2  | 3.818  | 1.892 | 1.000 | -2.526  | 10.162 |
|   | 3  | 0.545  | 1.608 | 1.000 | -4.848  | 5.939  |
|   | 14 | -1.091 | 1.667 | 1.000 | -6.681  | 4.499  |
|   | 21 | -1.091 | 1.598 | 1.000 | -6.449  | 4.267  |
|   | 28 | 0.364  | 1.795 | 1.000 | -5.655  | 6.383  |

---

---

|    |    |           |       |       |        |        |
|----|----|-----------|-------|-------|--------|--------|
|    | 0  | 6.364     | 2.701 | 0.661 | -2.695 | 15.422 |
|    | 1  | 4.000     | 1.639 | 0.541 | -1.497 | 9.497  |
| 14 | 2  | 4.909     | 2.429 | 1.000 | -3.235 | 13.053 |
|    | 3  | 1.636     | 1.817 | 1.000 | -4.456 | 7.729  |
|    | 7  | 1.091     | 1.667 | 1.000 | -4.499 | 6.681  |
|    | 21 | 0.000     | 1.350 | 1.000 | -4.526 | 4.526  |
|    | 28 | 1.455     | 1.694 | 1.000 | -4.225 | 7.134  |
|    | 0  | 6.364     | 2.651 | 0.595 | -2.528 | 15.255 |
|    | 1  | 4.000     | 1.722 | 0.713 | -1.773 | 9.773  |
| 21 | 2  | 4.909     | 1.920 | 0.408 | -1.529 | 11.347 |
|    | 3  | 1.636     | 1.695 | 1.000 | -4.047 | 7.320  |
|    | 7  | 1.091     | 1.598 | 1.000 | -4.267 | 6.449  |
|    | 14 | 0.000     | 1.350 | 1.000 | -4.526 | 4.526  |
|    | 28 | 1.455     | 1.283 | 1.000 | -2.847 | 5.756  |
|    | 0  | 4.909     | 2.246 | 0.978 | -2.624 | 12.442 |
|    | 1  | 2.545     | 1.494 | 1.000 | -2.463 | 7.554  |
| 28 | 2  | 3.455     | 2.161 | 1.000 | -3.792 | 10.701 |
|    | 3  | 0.182     | 1.731 | 1.000 | -5.622 | 5.986  |
|    | 7  | -0.364    | 1.795 | 1.000 | -6.383 | 5.655  |
|    | 14 | -1.455    | 1.694 | 1.000 | -7.134 | 4.225  |
|    | 21 | -1.455    | 1.283 | 1.000 | -5.756 | 2.847  |
|    | 1  | 1.263     | 2.517 | 1.000 | -7.178 | 9.704  |
| 0  | 2  | 1.474     | 2.483 | 1.000 | -6.853 | 9.800  |
| B  | 3  | 2.947     | 2.665 | 1.000 | -5.990 | 11.885 |
|    | 7  | 1.684     | 2.376 | 1.000 | -6.283 | 9.651  |
|    | 14 | 1.421E-14 | 2.907 | 1.000 | -9.748 | 9.748  |
|    | 21 | 1.053     | 2.853 | 1.000 | -8.515 | 10.620 |
|    | 28 | 1.895     | 2.417 | 1.000 | -6.211 | 10.001 |
| 1  | 0  | -1.263    | 2.517 | 1.000 | -9.704 | 7.178  |

---

---

|    |    |            |       |       |         |       |
|----|----|------------|-------|-------|---------|-------|
|    | 2  | 0.211      | 2.103 | 1.000 | -6.842  | 7.263 |
|    | 3  | 1.684      | 1.823 | 1.000 | -4.430  | 7.798 |
|    | 7  | 0.421      | 1.950 | 1.000 | -6.119  | 6.961 |
|    | 14 | -1.263     | 1.764 | 1.000 | -7.178  | 4.652 |
|    | 21 | -0.211     | 1.853 | 1.000 | -6.423  | 6.002 |
|    | 28 | 0.632      | 1.607 | 1.000 | -4.758  | 6.021 |
|    | 0  | -1.474     | 2.483 | 1.000 | -9.800  | 6.853 |
| 2  | 1  | -0.211     | 2.103 | 1.000 | -7.263  | 6.842 |
|    | 3  | 1.474      | 1.869 | 1.000 | -4.792  | 7.740 |
|    | 7  | 0.211      | 2.036 | 1.000 | -6.616  | 7.037 |
|    | 14 | -1.474     | 2.613 | 1.000 | -10.237 | 7.290 |
|    | 21 | -0.421     | 2.066 | 1.000 | -7.349  | 6.507 |
|    | 28 | 0.421      | 2.325 | 1.000 | -7.376  | 8.218 |
|    | 0  | -2.947     | 2.665 | 1.000 | -11.885 | 5.990 |
| 3  | 1  | -1.684     | 1.823 | 1.000 | -7.798  | 4.430 |
|    | 2  | -1.474     | 1.869 | 1.000 | -7.740  | 4.792 |
|    | 7  | -1.263     | 1.731 | 1.000 | -7.066  | 4.540 |
|    | 14 | -2.947     | 1.955 | 1.000 | -9.503  | 3.608 |
|    | 21 | -1.895     | 1.824 | 1.000 | -8.011  | 4.221 |
|    | 28 | -1.053     | 1.862 | 1.000 | -7.298  | 5.193 |
|    | 0  | -1.684     | 2.376 | 1.000 | -9.651  | 6.283 |
| 7  | 1  | -0.421     | 1.950 | 1.000 | -6.961  | 6.119 |
|    | 2  | -0.211     | 2.036 | 1.000 | -7.037  | 6.616 |
|    | 3  | 1.263      | 1.731 | 1.000 | -4.540  | 7.066 |
|    | 14 | -1.684     | 1.794 | 1.000 | -7.699  | 4.331 |
|    | 21 | -0.632     | 1.719 | 1.000 | -6.397  | 5.134 |
|    | 28 | 0.211      | 1.931 | 1.000 | -6.266  | 6.687 |
| 14 | 0  | -1.421E-14 | 2.907 | 1.000 | -9.748  | 9.748 |
|    | 1  | 1.263      | 1.764 | 1.000 | -4.652  | 7.178 |

---

---

|    |    |        |       |       |         |        |
|----|----|--------|-------|-------|---------|--------|
|    | 2  | 1.474  | 2.613 | 1.000 | -7.290  | 10.237 |
|    | 3  | 2.947  | 1.955 | 1.000 | -3.608  | 9.503  |
|    | 7  | 1.684  | 1.794 | 1.000 | -4.331  | 7.699  |
|    | 21 | 1.053  | 1.452 | 1.000 | -3.818  | 5.923  |
|    | 28 | 1.895  | 1.823 | 1.000 | -4.217  | 8.006  |
|    | 0  | -1.053 | 2.853 | 1.000 | -10.620 | 8.515  |
| 21 | 1  | 0.211  | 1.853 | 1.000 | -6.002  | 6.423  |
|    | 2  | 0.421  | 2.066 | 1.000 | -6.507  | 7.349  |
|    | 3  | 1.895  | 1.824 | 1.000 | -4.221  | 8.011  |
|    | 7  | 0.632  | 1.719 | 1.000 | -5.134  | 6.397  |
|    | 14 | -1.053 | 1.452 | 1.000 | -5.923  | 3.818  |
|    | 28 | 0.842  | 1.380 | 1.000 | -3.787  | 5.471  |
|    | 0  | -1.895 | 2.417 | 1.000 | -10.001 | 6.211  |
| 28 | 1  | -0.632 | 1.607 | 1.000 | -6.021  | 4.758  |
|    | 2  | -0.421 | 2.325 | 1.000 | -8.218  | 7.376  |
|    | 3  | 1.053  | 1.862 | 1.000 | -5.193  | 7.298  |
|    | 7  | -0.211 | 1.931 | 1.000 | -6.687  | 6.266  |
|    | 14 | -1.895 | 1.823 | 1.000 | -8.006  | 4.217  |
|    | 21 | -0.842 | 1.380 | 1.000 | -5.471  | 3.787  |

---

Based on estimated marginal means

a. Adjustment for multiple comparisons: Bonferroni.

---
